# Supplementary material
Source: PubMed Central journal article supplement (PMC3347097)
Supplement: supp_50.5.1748_JCM-JCM06185-11-s01.pdf [file supp_50.5.1748_JCM-JCM06185-11-s01.pdf]

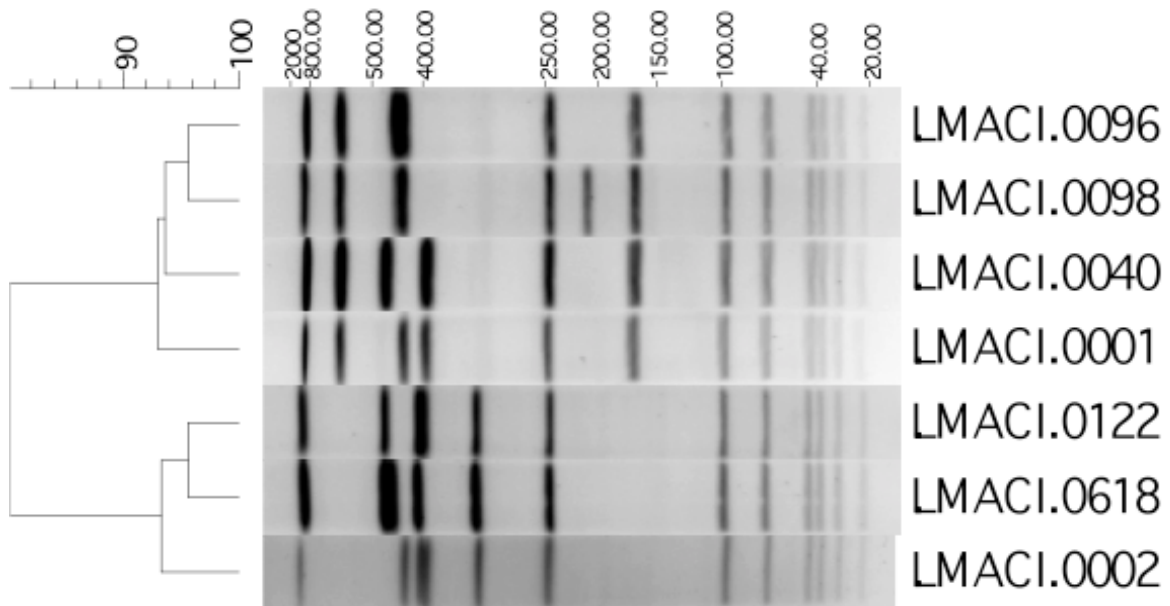

a)

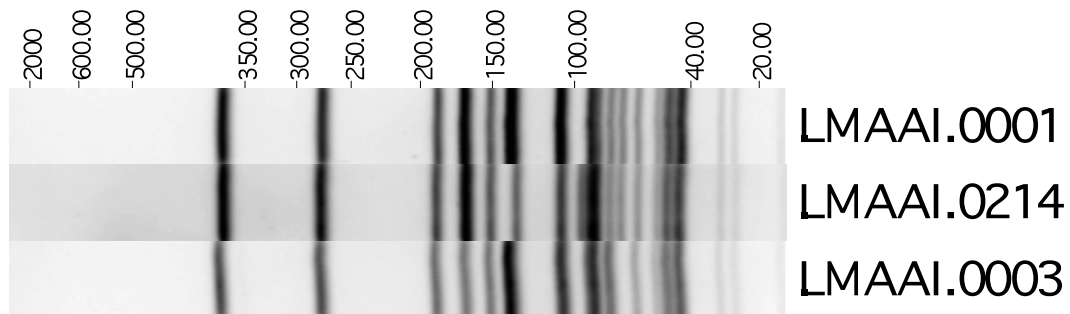

b)

**SUPPLEMENTARY FIG. 1.** Pulsed-field gel electrophoresis (PFGE) patterns observed amongst CC8/VT59 isolates from Canadian listeriosis cases, 1988-2010. Pattern designations were assigned by PulseNet Canada. a) *AscI*, b) *ApaI*.
