# Supplementary material
Source: PubMed Central journal article supplement (PMC3347097)
Supplement: supp_50.5.1748_JCM-JCM06185-11-s02.pdf [file supp_50.5.1748_JCM-JCM06185-11-s02.pdf]

**Supplementary Table 1.** Summary of subtyping results for the 71 *L. monocytogenes* isolates analyzed in the present study

| NML <sup>a</sup><br>Isolate<br>ID<br>Number | Estimated<br>Isolation<br>Date | Province | Source                | Serotype | PFGE/ <i>AscI</i> | PFGE/ <i>Apal</i> | PCR Results <sup>b</sup>    |               | MLST<br>ST | MVLST<br>ST<br>(VT <sup>c</sup> ) | Prophage<br>Type<br>(PT) <sup>d</sup> |
|---------------------------------------------|--------------------------------|----------|-----------------------|----------|-------------------|-------------------|-----------------------------|---------------|------------|-----------------------------------|---------------------------------------|
|                                             |                                |          |                       |          |                   |                   | LGI1 <sup>e</sup><br>Marker | ECV<br>marker |            |                                   |                                       |
| 88-0478                                     | 6/9/1988                       | ON       | blood                 | 1/2a     | LMACI.0001        | LMAAI.0001        | +                           | +             | 120        | 59                                | 4                                     |
| 88-1059                                     | 12/21/1988                     | NL       | blood                 | 3a       | LMACI.0001        | LMAAI.0001        | +                           | +             | 120        | 59                                | 4                                     |
| 95-0093                                     | 4/12/1995                      | AB       | blood                 | 1/2a     | LMACI.0001        | LMAAI.0001        | +                           | +             | 120        | 59                                | 4                                     |
| 96-0218                                     | 9/19/1996                      | BC       | blood                 | 1/2a     | LMACI.0001        | LMAAI.0001        | +                           | +             | 120        | 59                                | 4                                     |
| 96-0247                                     | 11/7/1996                      | AB       | blood                 | 1/2a     | LMACI.0001        | LMAAI.0001        | +                           | +             | 120        | 59                                | 4                                     |
| 06-6837                                     | 6/27/1997                      | QC       | blood                 | 1/2a     | LMACI.0001        | LMAAI.0001        | +                           | +             | 120        | 59                                | 4                                     |
| 06-6840                                     | 7/29/1997                      | QC       | blood                 | 1/2a     | LMACI.0001        | LMAAI.0001        | +                           | +             | 120        | 59                                | 4                                     |
| 97-1636                                     | 12/4/1997                      | SK       | blood                 | 1/2a     | LMACI.0001        | LMAAI.0003        | +                           | +             | 292        | 59                                | 4                                     |
| 98-0291                                     | 2/20/1998                      | ON       | blood                 | 1/2a     | LMACI.0001        | LMAAI.0001        | +                           | +             | 292        | 59                                | 4                                     |
| 98-2035                                     | 10/1/1998                      | ON       | blood                 | 1/2a     | LMACI.0040        | LMAAI.0003        | +                           | +             | 292        | 59                                | 4                                     |
| 06-6863                                     | 10/26/1998                     | QC       | blood                 | 1/2a     | LMACI.0001        | LMAAI.0001        | +                           | +             | 120        | 59                                | 4                                     |
| 99-3048                                     | 5/31/1999                      | ON       | blood                 | 1/2a     | LMACI.0001        | LMAAI.0003        | +                           | +             | 292        | 59                                | 4                                     |
| 99-3046                                     | 5/31/1999                      | ON       | blood                 | 1/2a     | LMACI.0002        | LMAAI.0001        | -                           | +             | 120        | 59                                | 4                                     |
| 99-6370                                     | 11/9/1999                      | ON       | blood                 | 1/2a     | LMACI.0040        | LMAAI.0003        | +                           | +             | 292        | 59                                | 4                                     |
| 99-6871                                     | 12/8/1999                      | NL       | clinical              | 1/2a     | LMACI.0001        | LMAAI.0001        | +                           | +             | 120        | 59                                | 4                                     |
| 00-1149                                     | 3/15/2000                      | QC       | clinical              | 1/2a     | LMACI.0001        | LMAAI.0001        | +                           | +             | 120        | 59                                | 4                                     |
| 00-5136                                     | 9/21/2000                      | ON       | blood                 | 1/2a     | LMACI.0001        | LMAAI.0001        | +                           | +             | 292        | 59                                | 4                                     |
| 01-1280                                     | 3/1/2001                       | ON       | blood                 | 1/2a     | LMACI.0001        | LMAAI.0001        | +                           | +             | 292        | 59                                | 4                                     |
| 01-1465                                     | 3/14/2001                      | AB       | blood                 | 1/2a     | LMACI.0096        | LMAAI.0001        | +                           | +             | 120        | 59                                | 4                                     |
| 01-1468                                     | 3/14/2001                      | NL       | brain tissue          | 1/2a     | LMACI.0098        | LMAAI.0001        | +                           | +             | 120        | 59                                | 4                                     |
| 01-2417                                     | 4/26/2001                      | BC       | blood                 | 1/2a     | LMACI.0001        | LMAAI.0001        | +                           | +             | 120        | 59                                | 4                                     |
| 01-3506                                     | 6/1/2001                       | ON       | CSF                   | 1/2a     | LMACI.0001        | LMAAI.0003        | +                           | +             | 120        | 59                                | 4                                     |
| 01-5252                                     | 8/3/2001                       | MB       | blood                 | 1/2a     | LMACI.0001        | LMAAI.0003        | +                           | +             | 387        | 59                                | 4                                     |
| 01-5373                                     | 8/16/2001                      | ON       | blood                 | 1/2a     | LMACI.0002        | LMAAI.0001        | -                           | +             | 120        | 59                                | 4                                     |
| 01-5991                                     | 9/5/2001                       | AB       | RTE turkey            | 1/2a     | LMACI.0128        | LMAAI.0001        | -                           | +             | 120        | 59                                | 4                                     |
| 01-6771                                     | 9/27/2001                      | ON       | clinical              | 1/2a     | LMACI.0001        | LMAAI.0001        | +                           | +             | 120        | 59                                | 4                                     |
| 01-7107                                     | 10/18/2001                     | BC       | blood                 | 1/2a     | LMACI.0122        | LMAAI.0003        | -                           | +             | 120        | 59                                | 4                                     |
| 01-7210                                     | 10/23/2001                     | BC       | liverwurst<br>sausage | 1/2a     | LMACI.0040        | LMAAI.0001        | +                           | +             | 120        | 59                                | 4                                     |
| 02-5993                                     | 9/19/2002                      | ON       | blood                 | 1/2a     | LMACI.0001        | LMAAI.0001        | +                           | +             | 120        | 59                                | 4                                     |
| 03-0402                                     | 1/23/2003                      | AB       | blood                 | 1/2a     | LMACI.0001        | LMAAI.0001        | +                           | +             | 120        | 59                                | 4                                     |
| 03-5473                                     | 8/19/2003                      | ON       | blood                 | 1/2a     | LMACI.0001        | LMAAI.0001        | +                           | +             | 120        | 59                                | 4                                     |
| 03-7262                                     | 10/10/2003                     | NS       | blood                 | 1/2a     | LMACI.0001        | LMAAI.0001        | +                           | +             | 120        | 59                                | 4                                     |
| 04-5457                                     | 9/9/2004                       | ON       | blood                 | 1/2a     | LMACI.0001        | LMAAI.0001        | +                           | +             | 292        | 59                                | 4                                     |
| 07-6082                                     | 10/3/2007                      | NS       | blood                 | 1/2a     | LMACI.0040        | LMAAI.0001        | +                           | +             | 120        | 59                                | 4                                     |
| 10-0814                                     | 2008                           | ON       | RTE meat              | 1/2a     | LMACI.0001        | LMAAI.0001        | +                           | +             | 292        | 59                                | 4                                     |
| 10-0815                                     | 2008                           | SK       | RTE meat              | 1/2a     | LMACI.0040        | LMAAI.0001        | +                           | +             | 292        | 59                                | 4                                     |
| 08-5375                                     | 8/1/2008                       | ON       | blood                 | 1/2a     | LMACI.0002        | LMAAI.0214        | -                           | +             | 120        | 59                                | 4                                     |
| 08-5578                                     | 8/8/2008                       | ON       | blood                 | 1/2a     | LMACI.0040        | LMAAI.0001        | +                           | +             | 292        | 59                                | 4                                     |
| 08-5923                                     | 8/25/2008                      | ON       | blood                 | 1/2a     | LMACI.0001        | LMAAI.0001        | +                           | +             | 120        | 59                                | 4                                     |

|         |            |    |                             |      |            |            |   |   |     |           |                 |
|---------|------------|----|-----------------------------|------|------------|------------|---|---|-----|-----------|-----------------|
| 08-6056 | 8/28/2008  | ON | turkey meat                 | 1/2a | LMACI.0040 | LMAAI.0003 | + | + | 292 | 59        | 4               |
| 08-6337 | 9/8/2008   | ON | blood                       | 1/2a | LMACI.0040 | LMAAI.0003 | + | + | 292 | 59        | 4               |
| 08-6569 | 9/15/2008  | ON | food processing environment | 1/2a | LMACI.0040 | LMAAI.0001 | + | + | 292 | 59        | 4               |
| 08-6997 | 9/24/2008  | ON | blood                       | 1/2a | LMACI.0040 | LMAAI.0003 | + | + | 292 | 59        | 4               |
| 08-7374 | 10/16/2008 | ON | food processing environment | 1/2a | LMACI.0001 | LMAAI.0001 | + | + | 292 | 59        | 4               |
| 08-7669 | 10/24/2008 | SK | blood                       | 1/2a | LMACI.0001 | LMAAI.0001 | + | + | 120 | 59        | 4               |
| 10-0819 | 2/3/2010   | ON | blood                       | 1/2a | LMACI.0618 | LMAAI.0003 | - | + | 8   | 59        | 12 <sup>c</sup> |
| 10-1046 | 2/15/2010  | ON | blood                       | 1/2a | LMACI.0001 | LMAAI.0001 | + | + | 120 | 59        | 4               |
| 10-5024 | 3/16/2010  | ON | prosciutto cooked ham       | 1/2a | LMACI.0001 | LMAAI.0001 | + | + | 120 | 59        | 4               |
| 10-2174 | 4/6/2010   | BC | blood                       | 1/2a | LMACI.0001 | LMAAI.0001 | + | + | 120 | 59        | 4               |
| 10-0809 | 1981       | NS | clinical                    | 4b   | LMACI.0160 | LMAAI.0449 | - | - | 1   | 20 (ECI)  | NA <sup>f</sup> |
| 81-0558 | 6/1/1981   | NS | CSF                         | 4b   | LMACI.0107 | LMAAI.0449 | - | - | 1   | 20 (ECI)  | NA              |
| 81-0861 | 7/1/1981   | NS | coleslaw                    | 4b   | LMACI.0648 | LMAAI.0449 | - | - | 1   | 20 (ECI)  | NA              |
| 10-0810 | 1996       | ON | clinical                    | 1/2b | LMACI.0046 | LMAAI.0223 | - | - | 5   | 63        | 11              |
| 10-0811 | 1996       | ON | imitation crab meat         | 1/2b | LMACI.0046 | LMAAI.0223 | - | - | 5   | 63        | 11              |
| 98-0041 | 1/21/1998  | ON | blood                       | 1/2b | LMACI.0028 | LMAAI.0023 | - | - | 5   | 63        | NA              |
| 10-0813 | 2000       | MB | clinical                    | 1/2a | LMACI.0118 | LMAAI.0005 | - | - | 7   | 56        | 13 <sup>c</sup> |
| 10-0812 | 2000       | MB | whipping cream              | 1/2a | LMACI.0118 | LMAAI.0005 | - | - | 7   | 56        | 13 <sup>c</sup> |
| 00-0346 | 1/27/2000  | ON | peritoneal fluid            | 1/2a | LMACI.0007 | LMAAI.0014 | - | - | 11  | 1 (ECIII) | 3               |
| 06-6909 | 10/9/2001  | QC | blood                       | 1/2a | LMACI.0033 | LMAAI.0122 | - | - | 7   | 56        | 10 <sup>c</sup> |
| 06-6914 | 11/20/2001 | QC | CSF                         | 1/2a | LMACI.0203 | LMAAI.0322 | - | + | 390 | 65        | 15              |
| 10-4754 | 2002       | QC | clinical                    | 1/2a | LMACI.0616 | LMAAI.0818 | - | - | 405 | 61        | NA              |
| 10-4758 | 2002       | QC | cheese                      | 1/2a | LMACI.0616 | LMAAI.0818 | - | - | 405 | 61        | NA              |
| 02-1115 | 2/15/2002  | ON | CSF                         | 4b   | LMACI.0023 | LMAAI.0140 | - | - | 1   | 20 (ECI)  | NA              |
| 06-6934 | 5/16/2002  | QC | blood                       | 1/2a | LMACI.0004 | LMAAI.0013 | - | - | 321 | 60        | NA              |
| 02-4056 | 7/4/2002   | ON | blood                       | 1/2a | LMACI.0015 | LMAAI.0024 | - | - | 311 | 45        | 12 <sup>c</sup> |
| 06-6956 | 10/28/2002 | QC | blood                       | 1/2a | LMACI.0044 | LMAAI.0074 | - | - | 37  | 61        | NA              |
| 04-5458 | 9/9/2004   | ON | blood                       | 4b   | LMACI.0009 | LMAAI.0234 | - | - | 217 | 62        | NA              |
| 10-0933 | 2008       | QC | blood                       | 1/2a | LMACI.0149 | LMAAI.0265 | - | - | 394 | 64        | NA              |
| 10-0934 | 2008       | QC | cheese                      | 1/2a | LMACI.0149 | LMAAI.0265 | - | - | 394 | 64        | NA              |
| 08-5587 | 8/1/2008   | ON | blood                       | 1/2a | LMACI.0035 | LMAAI.0414 | - | - | 380 | 66        | 16              |
| 10-5025 | 4/3/2009   | ON | cooked bacon flakes         | 1/2c | LMACI.0036 | LMAAI.0658 | - | - | 9   | 36        | 14              |

<sup>a</sup> National Microbiology Laboratory of Canada

<sup>b</sup> PCR detection of gene markers for *Listeria* Genomic Island 1 (LG11) (gene locus: LM5578\_1886, hypothetical protein) and Epidemic Clone V (ECV) (gene locus: LM5578\_2229, hypothetical protein)

<sup>c</sup> Multi-virulence-locus sequence typing (MVLST) sequence types (Virulence Types, VTs) were assigned based on Chen et al. (8)

<sup>d</sup> *comK* prophage junction fragments were amplified and sequenced and Prophage Types (PTs) were assigned based on Verghese et al. (35)

<sup>e</sup> Only the downstream junction fragment could be amplified in this isolate, so the Prophage Type was assigned based on this sequence alone

<sup>f</sup> NA, not applicable as neither junction fragments could be amplified

<sup>g</sup> All LG11 PCR results were confirmed by TaqMan® RT-PCR at the National Microbiology Laboratory of Canada

**Supplementary Table 2.** Oligonucleotide primer sequences and amplicon size of molecular markers for ECV, LGI1 and upstream and downstream *comK* prophage junction fragments.

| Primers                                                              | Primer Sequence (5' to 3') | Amplicon Size | Reference  |
|----------------------------------------------------------------------|----------------------------|---------------|------------|
| ECV multiplex marker (gene locus: LM5578_2229, hypothetical protein) |                            |               |            |
| 2229_F                                                               | TTGTTGAAGGAAGAGGTGGTC      | ~191          | This study |
| 2229_R                                                               | TCTTTTCGGCTCATTTTCGT       |               |            |
| ECV complete LM5578_2229 gene plus flanking regions                  |                            |               |            |
| 2228_30F                                                             | CTGGTGTTCCTCCTTTGTT        | ~982          | This study |
| 2228_30R                                                             | AGCACAGGGTTCCTTTGACA       |               |            |
| LGI1 marker (gene locus: LM5578_1886, hypothetical protein)          |                            |               |            |
| 1886_F                                                               | TAACGACAACACTATGCCAACG     | ~196          | This study |
| 1886_R                                                               | CGACAGTTTGTATTCCACCA       |               |            |
| Upstream Junction fragment                                           |                            |               |            |
| Can_F                                                                | TCCGCTTTGTTTCCTATTATCG     | ~900          | This study |
| Can_R                                                                | TATGTCGTGCCTGTCCACAT       |               |            |
| Downstream Junction fragment                                         |                            |               |            |
| Int76_F                                                              | TCTCGCATGGGTAAAAATCC       | ~1178         | This study |
| Rldna_R                                                              | AAAATCGGGACAACCTGCATC      |               |            |

**Supplementary Table 3.** DNA sequences of the virulence-gene fragments were deposited in GenBank under accession numbers JQ436380 through JQ436451 (*prfA*); JQ436164 through JQ436235 (*inlB*); JQ429661 through JQ429732 (*dal*); JQ436308 through JQ436379 (*lisR*); JQ436236 through JQ436307 (*inlC*); JQ429589 through JQ429660 (*clpP*); JQ436452 through JQ436477 (upstream *comK* prophage junction fragment); and JQ436121 through JQ436163 (downstream *comK* prophage junction fragment).

| NML <sup>a</sup> Isolate ID Number | <i>clpP</i> | <i>dal</i> | <i>inlB</i> | <i>inlC</i> | <i>lisR</i> | <i>prfA</i> | Upstream fragment | Downstream fragment |
|------------------------------------|-------------|------------|-------------|-------------|-------------|-------------|-------------------|---------------------|
| 88-0478                            | JQ24606     | JQ429681   | JQ436183    | JQ436264    | JQ436333    | JQ436396    | JQ436474          | JQ436140            |
| 88-1059                            | JQ24614     | JQ429674   | JQ436174    | JQ436267    | JQ436319    | JQ436406    | JQ436461          | JQ436129            |
| 95-0093                            | JQ24612     | JQ429686   | JQ436180    | JQ436266    | JQ436320    | JQ436410    | JQ436465          | JQ436134            |
| 96-0218                            | JQ24603     | JQ429688   | JQ436185    | JQ436260    | JQ436323    | JQ436407    | JQ436459          | JQ436127            |
| 96-0247                            | JQ24609     | JQ429679   | JQ436184    | JQ436262    | JQ436330    | JQ436408    | JQ436453          | JQ436126            |
| 06-6837                            | JQ24645     | JQ429724   | JQ436215    | JQ436298    | JQ436369    | JQ436436    |                   |                     |
| 06-6840                            | JQ24646     | JQ429725   | JQ436216    | JQ436299    | JQ436370    | JQ436440    |                   |                     |
| 97-1636                            | JQ24601     | JQ429691   | JQ436188    | JQ436245    | JQ436327    | JQ436399    | JQ436456          | JQ436122            |
| 98-0291                            | JQ24653     | JQ429732   | JQ436224    | JQ436306    | JQ436378    | JQ436427    |                   |                     |
| 98-2035                            | JQ24623     | JQ429708   | JQ436231    | JQ436284    | JQ436355    | JQ436448    |                   | JQ436160            |
| 06-6863                            | JQ24647     | JQ429726   | JQ436217    | JQ436300    | JQ436371    | JQ436438    |                   |                     |
| 99-3048                            | JQ24654     | JQ429730   | JQ436225    | JQ436307    | JQ436379    | JQ436428    |                   |                     |
| 99-3046                            | JQ24597     | JQ429692   | JQ436173    | JQ436249    | JQ436324    | JQ436395    | JQ436471          |                     |
| 99-6370                            | JQ24624     | JQ429709   | JQ436232    | JQ436285    | JQ436356    | JQ436449    |                   | JQ436161            |
| 99-6871                            | JQ24599     | JQ429683   | JQ436172    | JQ436258    | JQ436329    | JQ436390    | JQ436468          | JQ436131            |
| 00-1149                            | JQ24638     | JQ429715   | JQ436207    | JQ436295    | JQ436362    | JQ436430    |                   |                     |
| 00-5136                            | JQ24639     | JQ429716   | JQ436208    | JQ436296    | JQ436363    | JQ436431    |                   |                     |
| 01-1280                            | JQ24640     | JQ429719   | JQ436209    | JQ436289    | JQ436364    | JQ436432    |                   |                     |
| 01-1465                            | JQ24617     | JQ429673   | JQ436193    | JQ436246    | JQ436338    | JQ436389    | JQ436464          | JQ436136            |
| 01-1468                            | JQ24613     | JQ429682   | JQ436181    | JQ436252    | JQ436318    | JQ436399    | JQ436454          | JQ436121            |
| 01-2417                            | JQ24616     | JQ429672   | JQ436192    | JQ436256    | JQ436328    | JQ436401    | JQ436462          | JQ436137            |
| 01-3506                            | JQ24641     | JQ429720   | JQ436210    | JQ436290    | JQ436365    | JQ436433    |                   |                     |
| 01-5252                            | JQ24610     | JQ429680   | JQ436176    | JQ436265    | JQ436339    | JQ436394    | JQ436469          | JQ436141            |
| 01-5373                            | JQ24660     | JQ429710   | JQ436233    | JQ436286    | JQ436357    | JQ436450    |                   | JQ436149            |
| 01-5991                            | JQ24605     | JQ429676   | JQ436191    | JQ436253    | JQ436321    | JQ436403    | JQ436457          | JQ436138            |
| 01-6771                            | JQ24619     | JQ429687   | JQ436194    | JQ436251    | JQ436317    | JQ436397    | JQ436455          |                     |
| 01-7107                            | JQ24618     | JQ429684   | JQ436177    | JQ436250    | JQ436331    | JQ436391    | JQ436458          | JQ436139            |
| 01-7210                            | JQ24604     | JQ429675   | JQ436186    | JQ436257    | JQ436326    | JQ436400    | JQ436466          | JQ436128            |
| 02-5993                            | JQ24642     | JQ429721   | JQ436211    | JQ436291    | JQ436366    | JQ436434    |                   |                     |
| 03-0402                            | JQ24611     | JQ42969    | JQ436179    | JQ436261    | JQ436335    | JQ436402    | JQ436460          | JQ436143            |
| 03-5473                            | JQ24644     | JQ429722   | JQ436212    | JQ436292    | JQ436367    | JQ436434    |                   |                     |
| 03-7262                            | JQ24615     | JQ429677   | JQ436175    | JQ436247    | JQ436334    | JQ436405    | JQ436476          | JQ436135            |
| 04-5457                            | JQ24644     | JQ429723   | JQ436213    | JQ436297    | JQ436368    | JQ436425    |                   |                     |
| 07-6082                            | JQ24626     | JQ429695   | JQ436198    | JQ436271    | JQ436342    | JQ436415    |                   | JQ436151            |
| 10-0814                            | JQ24633     | JQ429701   | JQ436204    | JQ436277    | JQ436348    | JQ436421    |                   | JQ436156            |
| 10-0815                            | JQ24658     | JQ429702   | JQ436205    | JQ436278    | JQ436349    | JQ436422    |                   | JQ436157            |

|         |              |          |          |          |          |          |          |          |
|---------|--------------|----------|----------|----------|----------|----------|----------|----------|
| 08-5375 | JQ24600      | JQ429670 | JQ436187 | JQ436254 | JQ436322 | JQ436404 | JQ436467 | JQ436124 |
| 08-5578 | JQ24636      | JQ429718 | JQ436220 | JQ436302 | JQ436375 | JQ436441 |          |          |
| 08-5923 | JQ24637      | JQ429717 | JQ436221 | JQ436303 | JQ436375 | JQ436442 |          |          |
| 08-6056 | JQ24625      | JQ429712 | JQ436235 | JQ436287 | JQ436359 | JQ436451 |          | JQ436162 |
| 08-6337 | JQ24651      | JQ429729 | JQ436222 | JQ436304 | JQ436376 | JQ436443 |          |          |
| 08-6569 | JQ24627      | JQ429696 | JQ436199 | JQ436272 | JQ436343 | JQ436416 |          | JQ436152 |
| 08-6997 | JQ24628      | JQ429697 | JQ436200 | JQ436273 | JQ436344 | JQ436417 |          | JQ436153 |
| 08-7374 | JQ24652      | JQ429731 | JQ436223 | JQ436305 | JQ436377 | JQ436444 |          |          |
| 08-7669 | JQ24629      | JQ429698 | JQ436201 | JQ436274 | JQ436345 | JQ436418 |          | JQ436154 |
| 10-0819 | JQ42958<br>9 | JQ429690 | JQ436189 | JQ436244 | JQ436309 | JQ436409 |          | JQ436123 |
| 10-1046 | JQ24657      | JQ429704 | JQ436227 | JQ436280 | JQ436351 | JQ436424 |          | JQ436158 |
| 10-5024 | JQ24602      | JQ429671 | JQ436178 | JQ436259 | JQ436336 | JQ436388 | JQ436472 | JQ436125 |
| 10-2174 | JQ24598      | JQ429689 | JQ436195 | JQ436263 | JQ436332 | JQ436392 |          | JQ436130 |
| 10-0809 | JQ24592      | JQ429666 | JQ436167 | JQ436239 | JQ436315 | JQ436387 |          |          |
| 81-0558 | JQ24659      | JQ429706 | JQ436229 | JQ436282 | JQ436353 | JQ436446 |          |          |
| 81-0861 | JQ24596      | JQ429664 | JQ436165 | JQ436238 | JQ436310 | JQ436384 |          |          |
| 10-0810 | JQ24620      | JQ429699 | JQ436202 | JQ436275 | JQ436346 | JQ436419 |          | JQ436155 |
| 10-0811 | JQ24594      | JQ429667 | JQ436166 | JQ436237 | JQ436312 | JQ436386 | JQ436477 | JQ436148 |
| 98-0041 | JQ24621      | JQ429707 | JQ436230 | JQ436283 | JQ436354 | JQ436447 |          | JQ436159 |
| 10-0813 | JQ24630      | JQ429700 | JQ436203 | JQ436276 | JQ43637  | JQ436420 |          | JQ436147 |
| 10-0812 | JQ24593      | JQ429665 | JQ436169 | JQ436240 | JQ436311 | JQ436385 |          | JQ436146 |
| 00-0346 | JQ24635      | JQ429714 | JQ436206 | JQ436294 | JQ436360 | JQ436429 |          |          |
| 06-6909 | JQ24648      | JQ429727 | JQ436218 | JQ436301 | JQ436372 | JQ436439 |          |          |
| 06-6914 | JQ24608      | JQ429678 | JQ436182 | JQ436255 | JQ436337 | JQ436411 | JQ436475 | JQ436144 |
| 10-4754 | JQ24655      | JQ429705 | JQ436228 | JQ436281 | JQ436352 | JQ436445 |          | JQ436163 |
| 10-4758 | JQ24656      | JQ429663 | JQ436170 | JQ436241 | JQ436314 | JQ436382 | JQ436452 |          |
| 02-1115 | JQ24631      | JQ429711 | JQ436234 | JQ436268 | JQ436358 | JQ436412 |          |          |
| 06-6934 | JQ24649      | JQ429728 | JQ436219 | JQ436293 | JQ436373 | JQ436440 |          |          |
| 02-4056 | JQ24622      | JQ429695 | JQ436196 | JQ436269 | JQ436340 | JQ436413 |          | JQ436150 |
| 06-6956 | JQ24650      | JQ429713 | JQ436214 | JQ436288 | JQ436361 | JQ436426 |          |          |
| 04-5458 | JQ24634      | JQ429694 | JQ436197 | JQ436270 | JQ436341 | JQ436414 |          |          |
| 10-0933 | JQ24632      | JQ429703 | JQ436226 | JQ436279 | JQ436350 | JQ436423 |          |          |
| 10-0934 | JQ24591      | JQ429662 | JQ436168 | JQ436243 | JQ436315 | JQ436381 |          |          |
| 08-5587 | JQ24607      | JQ429685 | JQ436190 | JQ436248 | JQ436325 | JQ436393 | JQ436470 | JQ436142 |
| 10-5025 | JQ24595      | JQ42968  | JQ436171 | JQ436242 | JQ436313 | JQ436383 | JQ436473 | JQ436145 |
| J2-063  | JQ24590      | JQ429661 | JQ436164 | JQ436236 | JQ436308 | JQ436380 |          |          |
